# Supplementary material for: Urgent endoscopic retrograde cholangiopancreatography is not superior to early ERCP in acute biliary pancreatitis with biliary obstruction without cholangitis
Source: PubMed Central journal article supplement (PMC5798765; doi:10.1371/journal.pone.0190835), 2018-02-05
Supplement: pone.0190835.s002.pdf [file pone.0190835.s002.pdf]

**S2 Table. Hospitalization day and complications after matching the level of total bilirubin**

|                                               | Variable time to ERCP |                  | <i>P</i> -value |
|-----------------------------------------------|-----------------------|------------------|-----------------|
|                                               | ≤ 24 h (n = 14)       | 24–72 h (n = 14) |                 |
| Total bilirubin                               | 2.7 ± 1.6             |                  |                 |
| Total length of hospital stay, days*          | 4.8 ± 2.8             | 6.9 ± 3.5        | 0.084           |
| Duration of hospitalization after ERCP, days† | 4.1 ± 2.8             | 3.2 ± 2.5        | 0.403           |
| Post-ERCP complications                       |                       |                  | 0.541           |
| Cholangitis                                   | 2 (14.3)              | 1 (7.1)          |                 |

Variables are expressed as the mean ± SD or n (%).

\*The total length of hospital stay is the duration from admission to discharge.

†The duration of hospitalization after ERCP is the duration from ERCP to discharge.
